# Supplementary material for: Trafficking of the Plasmodium falciparum RhopH3 rhoptry protein through the Maurer’s clefts in Pf130 associated compartments in infected erythrocytes
Source: Preprints.org preprint supplement (doi:10.20944/preprints202410.1590.v1), 2024-10-21
Supplement: Supplementary file 1 [file supplementary]

**Supplementary Material**


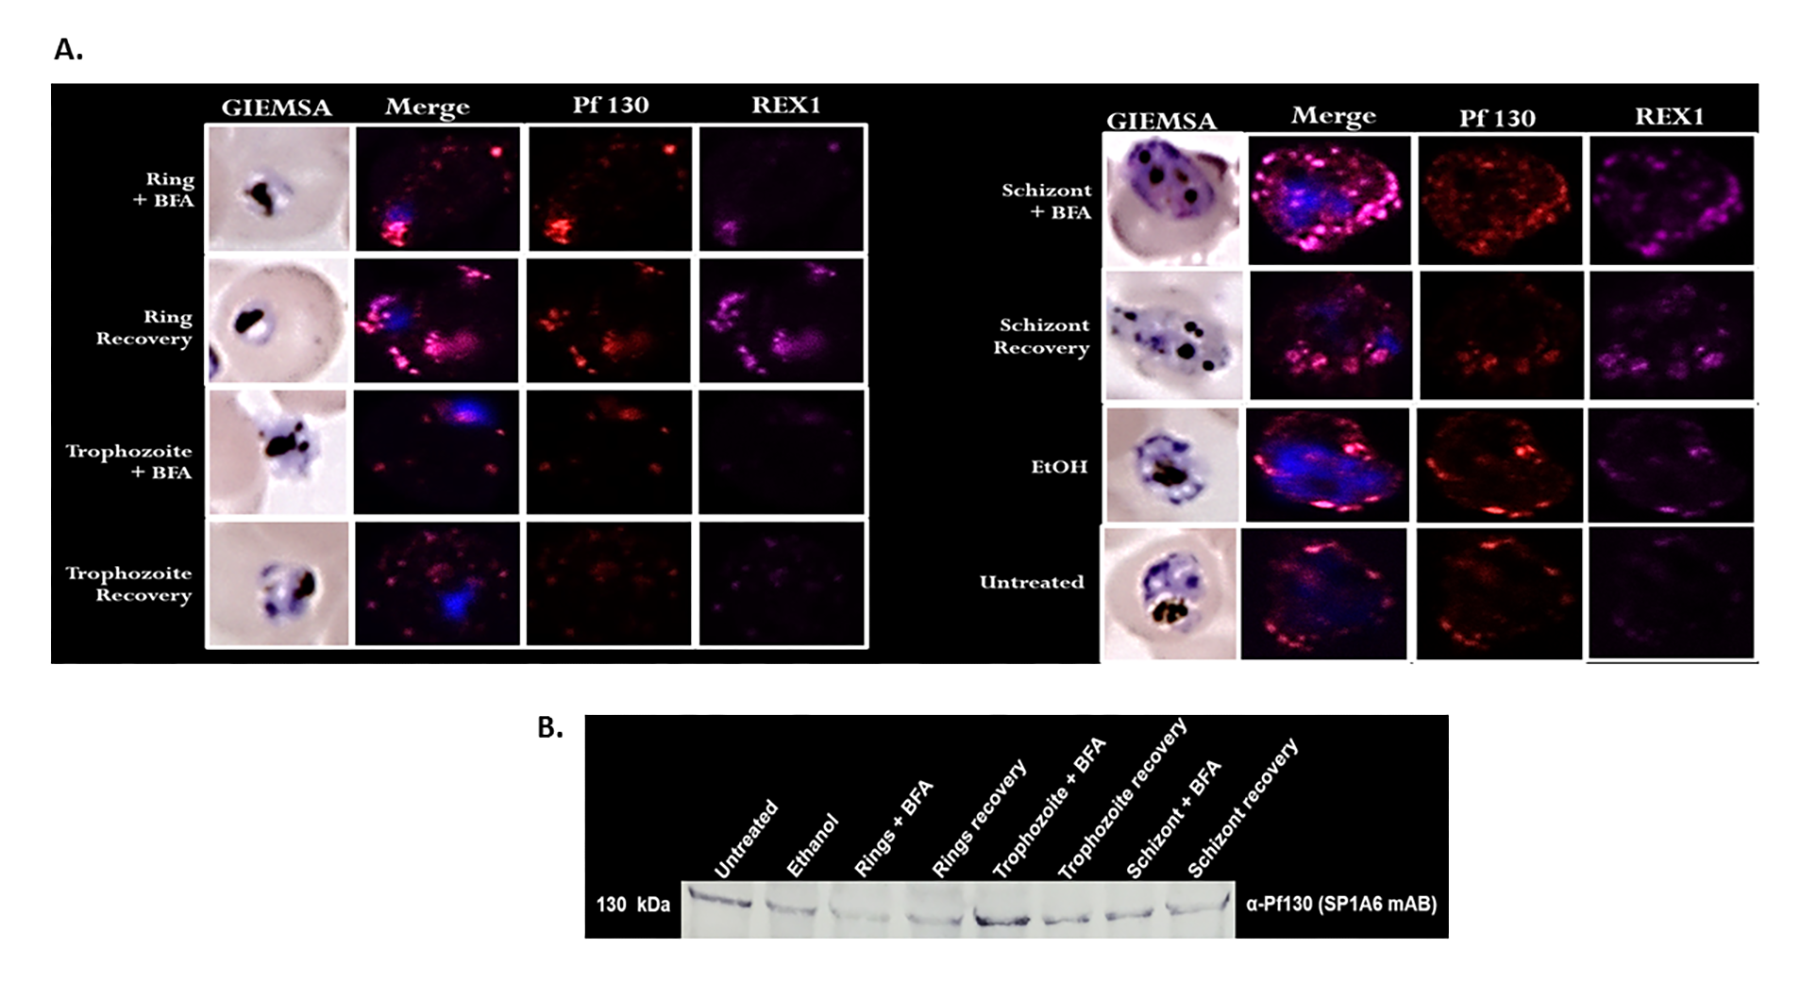


Supplementary Figure 1: Brefeldin A studies**,** (A) Ring and trophozoite stage parasites were treated with BFA and recovery analysis (B) Schizont stage treated with BFA and recovery, untreated and Ethanol controls (C) Immunoblotting analysis of the treatment and recovery of Pf-130. Giemsa-stained slides are shown to represent the life cycle stages of P. falciparum and are not the same cells incubated with antibodies for IFA.


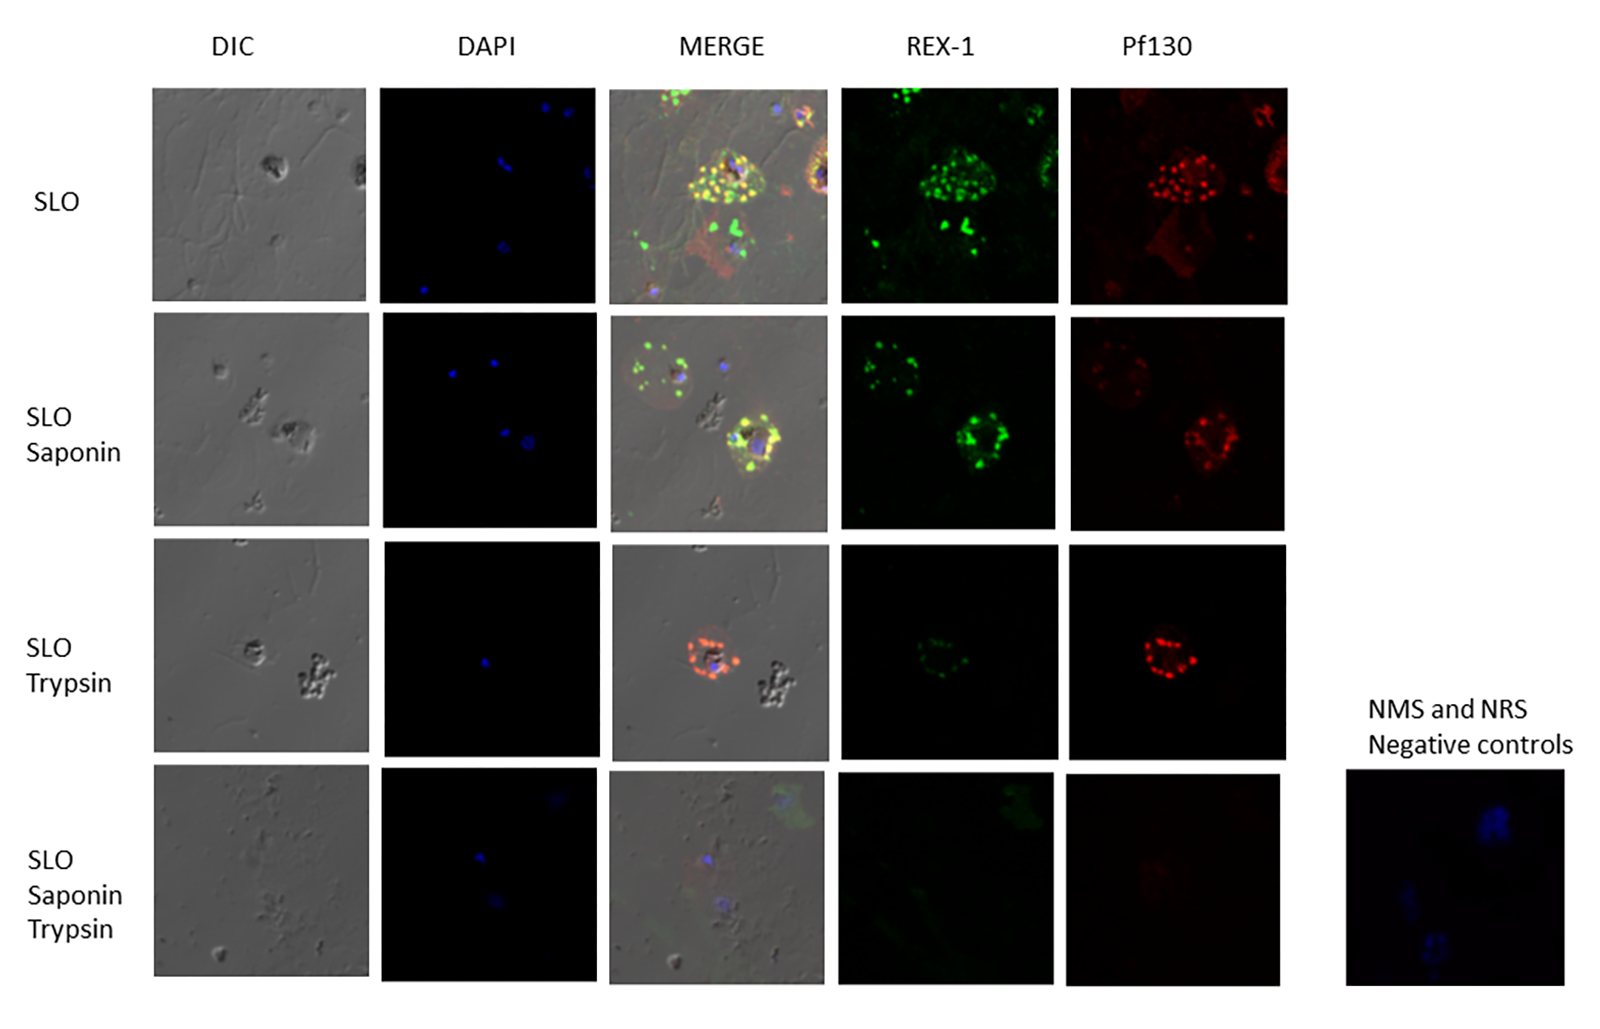


Supplementary Figure 2.REX1 and Pf130 are associated with the PVM and MCs in the infected erythrocyte cytoplasm.Localization and topology studies of Pf130 and REX1 using anti-Pf130 monoclonal antibody and anti-REX1 antibodies. *Plasmodium falciparum*-infected erythrocytes were treated either with SLO, SLO followed by SAP, SLO followed by Trypsin or SLO, followed by SAP and Trypsin treatment. Pf130 (Red) and SERA1 (Green). Negative control normal mouse and normal rabbit serum reactivity with infected erythrocytes.


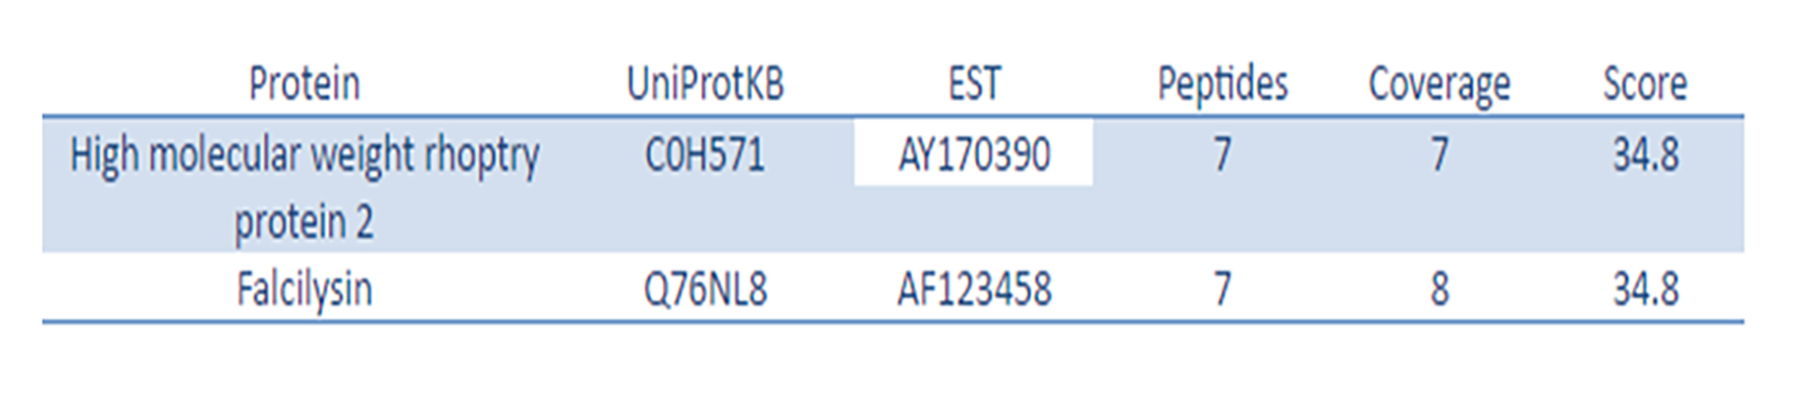


Supplementary Table 1. Pf130 proteins identification using LC-MS/MS
